# Supplementary material for: A modular approach to enzymatic ligation of peptides and proteins with oligonucleotides
Source: Royal Society of Chemistry journal article supplement (doi:10.1039/d1cc01348c), 2021-01-01
Supplement: d1cc01348c1.pdf [file d1cc01348c1.pdf]

## A Modular Approach to Enzymatic Ligation of Peptides and Proteins with Oligonucleotides

Derrick Jing Yang Tan, Vee Vee Cheong, Kah Wai Lim, and Anh Tuấn Phan

### Supporting Information

#### Table of Contents

|       |                                                           |          |
|-------|-----------------------------------------------------------|----------|
| I.    | General methods                                           | Page S3  |
| II.   | Synthetic procedure for (Gly-Gly-Gly) phosphoramidite tag | Page S3  |
| III.  | Synthetic procedure for (Gly-Leu) phosphoramidite tag     | Page S5  |
| IV.   | Oligonucleotide synthesis                                 | Page S7  |
| V.    | Peptide preparation                                       | Page S7  |
| VI.   | Sortase A expression                                      | Page S8  |
| VII.  | <i>OaAEP1b</i> expression                                 | Page S8  |
| VIII. | Cloning and expression of cyan fluorescent protein (CFP)  | Page S9  |
| IX.   | Ligation reaction with peptides                           | Page S10 |
| X.    | Ligation reaction with CFP                                | Page S10 |
| XI.   | Full SDS-PAGE gel images                                  | Page S23 |
| XII.  | References                                                | Page S24 |

#### List of Schemes

|           |                                               |         |
|-----------|-----------------------------------------------|---------|
| Scheme S1 | Synthesis of Gly-Gly-Gly phosphoramidite tag. | Page S3 |
| Scheme S2 | Synthesis of Gly-Leu phosphoramidite tag.     | Page S5 |

#### List of Tables

|          |                                                   |          |
|----------|---------------------------------------------------|----------|
| Table S1 | All oligonucleotide sequences used in this study. | Page S11 |
|----------|---------------------------------------------------|----------|

## List of Figures

|           |                                                                                                                                                  |          |
|-----------|--------------------------------------------------------------------------------------------------------------------------------------------------|----------|
| Figure S1 | HPLC traces for POC ligation reaction of peptides using sortase-7M.                                                                              | Page S12 |
| Figure S2 | HPLC trace for POC ligation reaction of peptides using <i>OaAEP1b</i> .                                                                          | Page S13 |
| Figure S3 | SDS-PAGE of ligation reaction between CFP <sub>SORT</sub> protein substrate with different oligonucleotide substrate using Sortase-7M ligase.    | Page S14 |
| Figure S4 | SDS-PAGE of ligation reaction between CFP <sub>PAL</sub> protein substrate with different oligonucleotide substrate using <i>OaAEP1b</i> ligase. | Page S14 |
| Figure S5 | Incorporation of multiple or a mixture of phosphoramidite tag at any position of oligonucleotide.                                                | Page S14 |

## List of NMR Spectra

|            |                                                                    |          |
|------------|--------------------------------------------------------------------|----------|
| Figure S6  | <sup>1</sup> H NMR spectrum of compound <b>S2</b>                  | Page S15 |
| Figure S7  | <sup>13</sup> C NMR spectrum of compound <b>S2</b>                 | Page S15 |
| Figure S8  | <sup>1</sup> H NMR spectrum of compound <b>S3</b>                  | Page S16 |
| Figure S9  | <sup>13</sup> C NMR spectrum of compound <b>S3</b>                 | Page S16 |
| Figure S10 | <sup>1</sup> H NMR spectrum of compound <b>1</b>                   | Page S17 |
| Figure S11 | <sup>31</sup> P{ <sup>1</sup> H} NMR spectrum of compound <b>1</b> | Page S17 |
| Figure S12 | <sup>1</sup> H NMR spectrum of compound <b>S5</b>                  | Page S18 |
| Figure S13 | <sup>13</sup> C NMR spectrum of compound <b>S5</b>                 | Page S18 |
| Figure S14 | <sup>1</sup> H NMR spectrum of compound <b>S6</b>                  | Page S19 |
| Figure S15 | <sup>13</sup> C NMR spectrum of compound <b>S6</b>                 | Page S19 |
| Figure S16 | <sup>1</sup> H NMR spectrum of compound <b>S7</b>                  | Page S20 |
| Figure S17 | <sup>13</sup> C NMR spectrum of compound <b>S7</b>                 | Page S20 |
| Figure S18 | <sup>1</sup> H NMR spectrum of compound <b>2</b>                   | Page S21 |
| Figure S19 | <sup>13</sup> C NMR spectrum of compound <b>2</b>                  | Page S21 |
| Figure S20 | <sup>31</sup> P{ <sup>1</sup> H} NMR spectrum of compound <b>2</b> | Page S22 |

## List of full SDS-PAGE gel image

|            |                                        |          |
|------------|----------------------------------------|----------|
| Figure S21 | Full image of SDS-PAGE gel in Fig. 2b. | Page S23 |
| Figure S22 | Full image of SDS-PAGE gel in Fig. S3. | Page S23 |
| Figure S23 | Full image of SDS-PAGE gel in Fig. S4. | Page S23 |

## I. General methods

Reagents and solvents were purchased from commercial sources (Sigma Aldrich, Acros, Merck, Alfa Aesar). DNA phosphoramidite monomers and thio-modifier C6 S-S phosphoramidite were purchased from Glen Research. Fmoc protected amino acids were purchased from GL Biochem. All reagents were used without further purification. Flash column chromatography was performed using Grace Davisil chromatographic silica media (40-63  $\mu\text{m}$ ). Reaction were monitored using Merck TLC silica gel 60 F<sub>254</sub> aluminium plates. TLC were visualized by UV light, *p*-anisaldehyde stain or ninhydrin stain. NMR spectra were recorded on a Bruker Avance 300 spectrometer. HRMS analysis were performed on a Waters Q-tof Premier MS.

## II. Synthetic procedure for (Gly-Gly-Gly) phosphoramidite tag

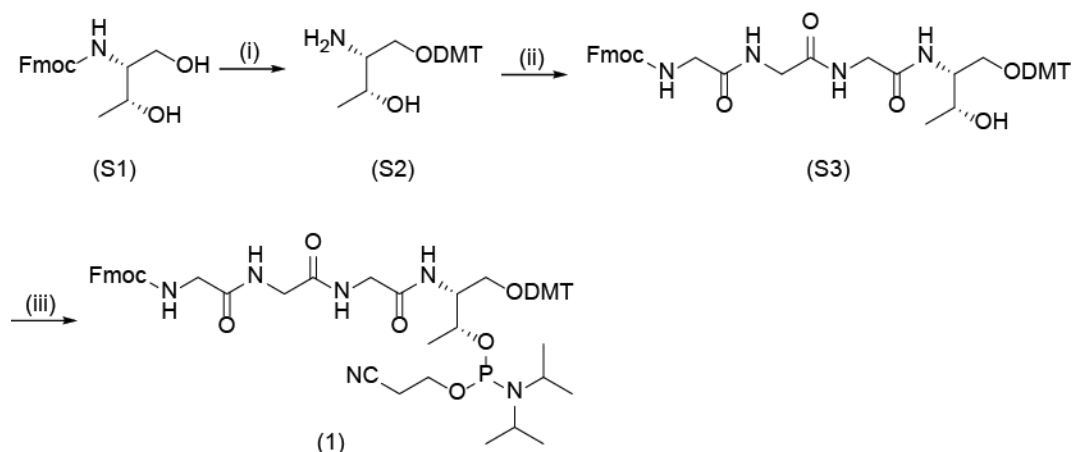

**Scheme S1.** Synthesis of Gly-Gly-Gly phosphoramidite tag. (i) 1) DMTrCl, pyridine, 2) piperidine, DMF, 98%; (ii) Fmoc-Gly-Gly-Gly-OH, HBTU, HoBt, DIPEA, DMF, 91%; (iii) 2-cyanoethyl N,N-diisopropylchlorophosphoramidite, DIPEA, DCM, 70%.

### (2R,3R)-3-amino-4-(bis(4-methoxyphenyl)(phenyl)methoxy)butan-2-ol (S2)

Fmoc-threoninol **S1** (300 mg, 916  $\mu\text{mol}$ ) was dissolved in anhydrous pyridine (4.00 mL) and added with DMTr-Cl (342 mg, 1.01 mmol) in 3 portions at 10 min interval. The resulting solution was stirred under nitrogen for 5 hours. Solvent was removed under reduced pressure until half volume and diluted with ethyl acetate. The mixture was extracted with saturated NaHCO<sub>3</sub> solution twice followed by brine. The organic phase was dried over Na<sub>2</sub>SO<sub>4</sub>, filtered and solvent removed under reduced pressure. Anhydrous DMF (1.44 mL) was then added to dissolve the oil. Piperidine (312.1 mg, 0.36 mL, 3.665 mmol) was added slowly and the resulting solution was stirred under nitrogen for 2 h at room temperature. The reaction mixture was diluted with chloroform and extracted with saturated NaHCO<sub>3</sub> solution twice followed by brine. The organic layer was dried over Na<sub>2</sub>SO<sub>4</sub>, filtered and solvent removed under reduced pressure. The product was purified by flash column chromatography (0-2% MeOH/DCM) to give **S2** (366 mg, 98%) as a yellow oil. <sup>1</sup>H NMR (300 MHz; CDCl<sub>3</sub>):  $\delta$  1.07 (3H, d, *J* 6.27, Threoninol CH<sub>3</sub>), 2.60-2.68 (1H, m, threoninol H $\alpha$ ), 3.08 (1H,

dd,  $J$  5.85 9.41 threoninol CH<sub>2</sub>), 3.24 (1H, dd,  $J$  4.17 9.41 threoninol CH<sub>2</sub>), 3.65 (1H, quintet, threoninol H $\beta$ ), 3.77 (6H, s, 2 x OCH<sub>3</sub>), 6.82 (4H, d,  $J$  8.82, H-Ar), 7.15-7.35 (7H, m, H-Ar), 7.38-7.46 (2H, m, H-Ar). <sup>13</sup>C NMR (75 MHz, CDCl<sub>3</sub>):  $\delta$  19.96, 55.26, 57.16, 65.97, 68.04, 86.20, 113.21, 126.88, 127.91, 128.16, 130.08, 136.01, 136.10, 144.90, 158.57. HRMS calc. for C<sub>25</sub>H<sub>30</sub>NO<sub>4</sub>: 408.2175; found: 408.2174.

**(9H-fluoren-9-yl)methyl ((R)-4-((R)-1-hydroxyethyl)-1,1-bis(4-methoxyphenyl)-6,9,12-trioxo-1-phenyl-2-oxa-5,8,11-triazatridecan-13-yl)carbamate (S3)**

A solution of Fmoc-Gly-Gly-Gly-OH (505 mg, 1.23 mmol), DIPEA (476 mg, 0.64 mL, 3.68 mmol), HoBt (166 mg, 1.23 mmol) and HBTU (512 mg, 1.35 mmol) dissolved in anhydrous DMF (3.5 mL) was added slowly to a solution of **S2** (500 mg, 1.23 mmol) in anhydrous DMF (3 mL). The resulting solution was stirred under nitrogen for 2 h at room temperature. The reaction mixture was poured into ice cold water and extracted twice with ethyl acetate. The combine organic layer was washed with water followed by brine. The organic layer was then dried over Na<sub>2</sub>SO<sub>4</sub>, filtered and solvent removed under reduced pressure. The product was purified by flash column chromatography (0-6% MeOH/DCM) to afford the product **S3** (899 mg, 92%) as a faint yellowish solid. <sup>1</sup>H NMR (300 MHz; MeOD):  $\delta$  1.08 (3H, d,  $J$  6.38, threoninol -CH<sub>3</sub>), 3.06-3.18 (1H, m, threoninol CH<sub>2</sub>), 3.24-3.33 (1H, m, threoninol CH<sub>2</sub>), 3.73 (6H, s, 2 x OCH<sub>3</sub>), 3.82 (2H, s, Gly -CH<sub>2</sub>) 3.87-4.03 (5H, m, threoninol H $\alpha$  and 2 x Gly -CH<sub>2</sub>) 4.03-4.13 (1H, m, threoninol H $\beta$ ), 4.17 (1H, t,  $J$  6.45, Fmoc -CH), 4.36 (2H, d,  $J$  6.76, Fmoc -CH<sub>2</sub>), 6.83 (4H, d,  $J$  8.84, H-Ar), 7.14-7.48 (13H, m, H-Ar), 7.57-7.69 (2H, m, H-Ar), 7.79 (2H, d,  $J$  7.50, H-Ar). <sup>13</sup>C NMR (75 MHz, MeOD):  $\delta$  20.33, 43.46, 43.88, 45.15, 48.29, 55.67, 56.57, 87.32, 114.06, 120.90, 126.18, 127.70, 128.15, 128.73, 128.78, 129.28, 131.24, 137.21, 137.29, 142.53, 145.16, 145.19, 146.42, 159.29, 159.99, 171.62, 172.09, 173.14. HRMS calc. for C<sub>46</sub>H<sub>49</sub>N<sub>4</sub>O<sub>9</sub>: 801.3500; found: 801.3503.

**(9H-fluoren-9-yl)methyl ((4R)-4-((1R)-1-(((2-cyanoethoxy)(diisopropylamino)phosphaneyl)oxy)ethyl)-1,1-bis(4-methoxyphenyl)-6,9,12-trioxo-1-phenyl-2-oxa-5,8,11-triazatridecan-13-yl)carbamate, (1)**

**8** (347 mg, 433  $\mu$ mol) that was suspended in anhydrous DCM (3.34 mL) was added with DIPEA (140 mg, 189  $\mu$ L, 1.08 mmol). 2-cyanoethyl N,N-diisopropylchlorophosphoramidite (123 mg, 116  $\mu$ L, 520  $\mu$ mol) was then added dropwise over several min and the resulting solution was then allowed to stir at room temperature under nitrogen for 30 min. The reaction mixture was diluted with DCM and extracted with saturated KCl solution. The organic layer was dried over Na<sub>2</sub>SO<sub>4</sub>, filtered and solvent removed under reduced pressure. The crude product was then purified by flash column chromatography (0-5% MeOH/DCM) to give **1** (307 mg, 71%) as a white foam. <sup>31</sup>P NMR (162 MHz; CDCl<sub>3</sub>):  $\delta$  148.13, 148.82.

### III. Synthetic procedures for (Gly-Leu) phosphoramidite tag

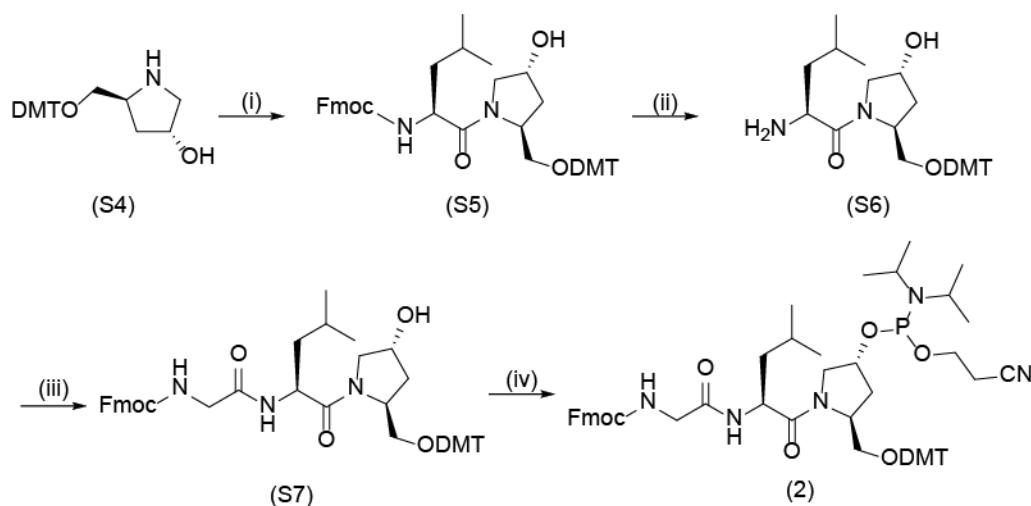

**Scheme S2.** Synthesis of Gly-Leu phosphoramidite tag. (i) Fmoc-L-Leu-OH, HBTU, HoBt, DIPEA, DMF, 85%; (ii) piperidine, DMF, 62%; (iii) Fmoc-Gly-OH, HBTU, DIPEA, DMF, 61%; (iv) 2-cyanoethyl N,N-diisopropylchlorophosphoramidite, DIPEA, DCM, 72%.

#### (3R,5S)-5-((bis(4-methoxyphenyl)(phenyl)methoxy)methyl)pyrrolidin-3-ol (**S4**)

Compound (**S4**) was synthesized according to procedure reported by Prakash *et al.*<sup>1</sup>

#### (9H-fluoren-9-yl)methyl ((S)-1-((2S,4R)-2-((bis(4-methoxyphenyl)(phenyl)methoxy)methyl)-4-hydroxypyrrolidin-1-yl)-4-methyl-1-oxopentan-2-yl)carbamate (**S5**)

A solution of **S4** (200 mg, 477  $\mu$ mol) in anhydrous DMF (1 mL) was added to a stirring solution of Fmoc-L-Leu-OH (168 mg, 477  $\mu$ mol), DIPEA (185 mg, 0.25 mL, 1.43 mmol), HBTU (199 mg, 524  $\mu$ mol) and HoBt (64 mg, 477  $\mu$ mol) in anhydrous DMF (1.8 mL). The resulting mixture was stirred under nitrogen for 1 h at room temperature. The reaction mixture was poured into ice cold water and extracted twice with ethyl acetate. The combine organic layer was washed with water followed by brine and dried over Na<sub>2</sub>SO<sub>4</sub>. Solvent was removed under reduced pressure and the crude product was purified by silica flash column chromatography (30-50% EA/Hex with 1% TEA) to give **S5** (305 mg, 85%) as a white foam. <sup>1</sup>H NMR (300 MHz, CDCl<sub>3</sub>):  $\delta$  0.81-1.05 (6H, m, Leu 2 x CH<sub>3</sub>), 1.49-1.60 (2H, m, Leu H $\beta$ ), 1.70-1.80 (1H, m, Leu H $\gamma$ ), 1.91-2.23 (2H, m, prolinol H3'/H3''), 3.07-3.16 (1H, m, prolinol H1'), 3.45-3.60 (1H, m, prolinol H1''), 3.65-3.73 (1H, m, prolinol H5'), 3.78 (6H, s, 2 x OCH<sub>3</sub>), 3.88-4.10 (1H, m, prolinol H5''), 4.14-4.25 (1H, m, Fmoc CH), 4.27-4.40 (2H, m, Fmoc CH<sub>2</sub>), 4.40-4.67 (3H, m, prolinol H2, H4, Leu H $\alpha$ ), 5.52 (1H, d, *J* 8.52, NH), 6.64-6.88 (4H, m, H-Ar), 7.17-7.43 (13H, m, H-Ar), 7.52-7.63 (2H, m, H-Ar), 7.76 (2H, d, *J* 7.35, H-Ar). <sup>13</sup>C NMR (75 MHz; CDCl<sub>3</sub>):  $\delta$  8.53, 22.11, 23.26, 24.65, 36.45, 42.06, 42.51, 45.63, 47.16, 50.87, 55.20, 55.73, 56.02, 59.97, 63.01, 67.16, 70.49, 86.01, 113.08, 119.95, 125.17, 126.79, 127.08, 127.69, 127.77, 128.09, 129.14, 130.01, 135.95, 136.13, 141.29, 143.74, 143.78, 143.91, 144.96, 158.46, 171.60. HRMS calc. for C<sub>47</sub>H<sub>50</sub>N<sub>2</sub>O<sub>7</sub>: 755.3696; found: 755.3687

**(S)-2-amino-1-((2S,4R)-2-((bis(4-methoxyphenyl)(phenyl)methoxy)methyl)-4-hydroxypyrrolidin-1-yl)-4-methylpentan-1-one (S6)**

To a solution of **S5** (369 mg, 489  $\mu\text{mol}$ ) in anhydrous DMF (1.7 mL) was added piperidine (167 mg, 193  $\mu\text{L}$ , 1.96 mmol). The resulting solution was stirred at room temperature under nitrogen for 2 h. The reaction mixture was diluted with chloroform and extracted with saturated sodium bicarbonate solution twice followed by brine. The organic layer was dried over  $\text{Na}_2\text{SO}_4$ , filtered and solvent removed under reduced pressure. The crude product was then purified by silica flash column chromatography (0-5% MeOH/DCM with 1% TEA) to give **S6** (184 mg, 70%) as a white foam.  $^1\text{H}$  NMR (300 MHz;  $\text{CDCl}_3$ ):  $\delta$  0.80-0.97 (6H, m, Leu 2 x  $\text{CH}_3$ ), 1.41-1.61 (2H, m, Leu  $\text{H}\beta$ ), 1.67-1.87 (1H, m, Leu  $\text{H}\gamma$ ), 1.89-2.04 (1H, m, prolinol  $\text{H}3'$ ), 2.05-2.20 (1H, m, prolinol  $\text{H}3''$ ), 2.96-3.15 (1H, m, prolinol  $\text{H}1'$ ), 3.46-3.64 (2H, m, prolinol  $\text{H}1''$ , Leu  $\text{H}\alpha$ ), 3.67-3.82 (8H, m, 2 x  $\text{OCH}_3$ ,  $\text{H}5'$ ,  $\text{H}5''$ ), 3.82-3.96 (2H, m,  $\text{NH}_2$ ), 4.39-4.48 (1H, m, prolinol  $\text{H}2$ ), 4.51 (1H, s, prolinol  $\text{H}4$ ), 6.74-6.86 (4H, m, H-Ar), 7.13-7.30 (7H, m, H-Ar), 7.30-7.38 (2H, d,  $J$  7.68, H-Ar).  $^{13}\text{C}$  NMR (75 MHz,  $\text{CDCl}_3$ ):  $\delta$  22.08, 23.29, 24.67, 36.10, 43.79, 44.76, 50.79, 55.22, 55.28, 55.84, 56.16, 62.87, 70.42, 85.94, 113.10, 126.78, 127.78, 128.11, 130.02, 135.98, 136.19, 145.00, 158.46. HRMS calc. for  $\text{C}_{32}\text{H}_{40}\text{N}_2\text{O}_5$ : 533.3015; found: 533.3016.

**(9H-fluoren-9-yl)methyl (2-(((S)-1-((2S,4R)-2-((bis(4-methoxyphenyl)(phenyl)methoxy)methyl)-4-hydroxypyrrolidin-1-yl)-4-methyl-1-oxopentan-2-yl)amino)-2-oxoethyl)carbamate (S7)**

To a stirring solution of **S6** (294 mg, 551  $\mu\text{mol}$ ) in anhydrous DMF (1.6 mL) was added a solution of Fmoc-Gly-OH (164 mg, 551  $\mu\text{mol}$ ), DIPEA (285 mg, 0.38 mL, 2.20 mmol) and HBTU (230 mg, 606  $\mu\text{mol}$ ) in anhydrous DMF (1.5 mL). The resulting mixture was stirred under nitrogen for 1h at room temperature. The reaction mixture was poured into ice cold water and extracted twice with ethyl acetate. Combined organic layer was washed with water followed by brine. The organic layer was dried over  $\text{Na}_2\text{SO}_4$ , filtered and solvent removed under reduced pressure. The crude product was purified by silica flash column chromatography (50-100% EA/Hex with 1% TEA) to give **S7** (322 mg, 72%) as a yellow foam.  $^1\text{H}$  NMR (300 MHz;  $\text{CDCl}_3$ ):  $\delta$  0.78-1.02 (6H, m, Leu 2 x  $\text{CH}_3$ ), 1.46-1.73 (3H, m, Leu  $\text{H}\beta$ , Leu  $\text{H}\gamma$ ), 1.84-2.24 (2H, m, prolinol  $\text{H}3'/\text{H}3''$ ), 2.93-3.11 (1H, m, prolinol  $\text{H}1'$ ), 3.51-3.67 (2H, m, prolinol  $\text{H}1''$ , prolinol  $\text{H}5'$ ), 3.60-3.69 (1H, m, prolinol  $\text{H}5''$ ), 3.71 (6H, s, 2 x  $\text{OCH}_3$ ), 3.79-3.91 (2H, m, Gly  $\text{H}\alpha$ ), 3.96-4.08 (1H, m, prolinol  $\text{H}5''$ ), 4.09-4.24 (1H, m, Fmoc CH), 4.33 (2H, d,  $J$  6.54, Fmoc  $\text{CH}_2$ ), 4.52-4.40 (2H, m, prolinol  $\text{H}2'$ , prolinol  $\text{H}4'$ ), 4.72-4.92 (1H, m, Leu  $\text{H}\alpha$ ), 6.18 (1H, s, Gly NH), 6.75 (4H, d,  $J$  8.49, H-Ar) 7.09-7.28 (10H, m, H-Ar and Leu NH), 7.29-7.43 (4H, m, H-Ar), 7.56 (2H, d,  $J$  7.17, H-Ar), 7.72 (2H, d,  $J$  7.53, H-Ar).  $^{13}\text{C}$  NMR (75 MHz,  $\text{CDCl}_3$ ):  $\delta$  22.19, 23.12, 24.66, 35.98, 42.05, 44.15, 47.06, 49.49, 55.13, 56.04, 56.22, 62.60, 67.20, 70.36, 85.85, 113.02, 119.89, 125.15, 126.73, 127.09, 127.67, 127.72, 128.03, 129.95, 129.99, 135.85, 136.13, 141.22, 143.81, 144.93, 158.40, 169.50, 171.43. HRMS calc. for  $\text{C}_{49}\text{H}_{53}\text{N}_3\text{O}_8$ : 812.3909; found: 812.3911.

**(2S,4R)-1-(((9H-fluoren-9-yl)methoxy)carbonyl)glycyl-L-leucyl)-2-((bis(4-methoxyphenyl)(phenyl)methoxy)methyl)-4-(((2-cyanoethoxy)(diisopropylamino)phosphaneyl)oxy)pyrrolidin-3-ylum (2)**

DIPEA (119.1 mg, 0.16 mL, 921.2  $\mu$ mol) was added to a stirring solution of **S7** (299 mg, 369  $\mu$ mol) in anhydrous DCM (2.85 mL) under nitrogen. N,N-diisopropylchlorophosphoramidite (105 mg, 99  $\mu$ L, 442  $\mu$ mol) was then added dropwise over several min to the reaction mixture and the resulting solution was stirred at room temperature under nitrogen for 30 min. The reaction mixture was diluted with anhydrous DCM and extracted with saturated KCl solution. The organic layer was dried over Na<sub>2</sub>SO<sub>4</sub>, filtered and solvent removed under reduced pressure. The crude product was purified by silica flash column chromatography (50-65% EA/Hex with 1% TEA) to give **2** (333 mg, 89%) as a white foam. <sup>31</sup>P NMR (162 MHz; CDCl<sub>3</sub>):  $\delta$  147.45, 147.96, 148.16, 148.57.

#### IV. Oligonucleotide synthesis

All DNA oligonucleotides were chemically synthesized on the Applied Biosystems Inc. (ABI) 394 DNA/RNA synthesizer using standard phosphoramidite chemistry. A solution of phosphoramidite **1** in anhydrous DCM (0.12 M) or **2** in anhydrous ACN (0.12M) was used for the coupling, with an extended coupling time of 10 min. Prepacked 1  $\mu$ mol functionalized controlled pore glass column (*Glen Research*) was used for 5' or internal tagged oligonucleotide and 1  $\mu$ mol UnyLinker (*Chemgenes*) was used for 3' tagged oligonucleotide. The coupling efficiency of phosphoramidite **1** and **2** was similar to that of standard DNA phosphoramidites. Oligonucleotides were cleaved from the support and deprotected with concentrated aq. NH<sub>3</sub> at 55 °C for 16 h. The oligonucleotide was then purified by reverse phase HPLC (250 x 10 mm, Waters, XBridge BEH C18) with a gradient 5% to 35% ACN over 8 min followed by 35% to 100% ACN in 12 min using ACN/TEAA mobile phase mixture. DMT was removed using 2% or 3% TFA solution, for PO or PS oligonucleotide respectively, on a PolyPak cartridge (*Glen Research*). The purified oligonucleotide was then desalted using Glen Pak 2.5 desalting column (*Glen Research*). The desalted oligonucleotide was then lyophilized, dissolved in deionized water and quantified by UV absorbance at 260 nm. Isolated yield of the modified oligonucleotides was comparable to that of unmodified oligonucleotides having similar length.

#### V. Peptides preparation

All peptides were purchased from *Chempeptide Limited*. The peptide was dissolved in DI water to make up a stock solution of 5 mM for *Pep1* and *Pep3*, 9.95 mM for *Pep2* and 0.72 mM for *Pep4*.

## **VI. Sortase A expression**

The plasmid containing gene fragment encoding the Sortase A mutant, Sortase-7M, was purchased from *Addgene* and transformed into Rosetta T1R cells. The cells were grown in LB containing antibiotics to OD<sub>600</sub> 0.6 – 0.8, and induced with addition of 0.5 mM IPTG at 18 °C overnight. Cells were harvested by centrifugation and the cell pellet resuspended in lysis buffer containing 50mM Tris-HCl, pH7.5, 150mM NaCl, 10% (v/v) glycerol. Cells were lysed by sonication, and the crude lysate clarified by centrifugation at 21,000 rpm at 4 °C for 1 hour. The soluble protein was purified by Ni-affinity chromatography (HisTrap, GE Healthcare) followed by size exclusion chromatography (GE Healthcare) pre-equilibrated with 50mM Tris-HCl, pH7.5, 150mM NaCl, 10% (v/v) glycerol. The sortase-7M protein was concentrated using 10 kDa MWCO centricon (Millipore), concentration determined using bicinchoninic acid protein assay (Pierce) and stored at -80 °C.

## **VII. OaAEP1b expression**

A gene fragment encoding for an N-terminal histidine-tag with human ubiquitin (1 – 76 aa), and OaAEP1b (24 – 474 aa) with C247A mutation was synthesized (IDT), cloned into pET-28b vector (Novagen) and transformed into Rosetta T1R cells. The cells were expressed and purified as described by Yang and coworkers<sup>2</sup> with slight modification to the procedures. Briefly, cells were grown in LB containing antibiotics to OD<sub>600</sub> 0.6 – 0.8, and induced with addition of 0.5 mM IPTG, shaking at 220 rpm at 16 °C overnight. Cells were harvested by centrifugation at 10,000 rpm at 4 °C for 10 mins and the cell pellet resuspended in lysis buffer containing 50 mM Tris-HCl pH 7.5, 150 mM NaCl, 10 % (v/v) glycerol and 0.05 % (v/v) Nonidet P-40. Cells were lysed by sonication, and the crude lysate clarified by centrifugation at 21,000 rpm at 4 °C for 20 min. The soluble protein was purified by Ni-affinity chromatography (HisTrap, GE Healthcare) and anion exchange chromatography (HiTrapQ, GE Healthcare). The purified protein fractions were combined in buffer containing 20 mM HEPES pH 7.0, 2 mM DTT, 10 % (v/v) glycerol. The OaAEP1b protein was activated by the removal of the cap domain of OaAEP1b with the addition of glacial acetic acid to achieve pH 4.0 in the sample. The protein was left at room temperature overnight, and the completeness of the reaction monitored by SDS-PAGE. The activated OaAEP1b protein was concentrated using 10 kDa MWCO centricon (Millipore) and the protein concentration determined using bicinchoninic acid protein assay (Pierce), and stored at -80 °C.



## VIII. Cloning and expression of cyan fluorescent protein (CFP).

### Cyan fluorescent protein (CFP<sub>PAL</sub>)

MGSSHHHHHSQDPMVSKGEELFTGVVPILVELDGDVNGHKFSVSGEGEGDATYGKLTCLKFICTTGKLP  
VPWPTLVTTLTWGVQCFSRYPDHMKQHDFFKSAMPEGYVQERTIFFKDDGNYKTRAEVKFEGDTLVNRI  
ELKGIDFKEDGNILGHKLEYNVYISHNVYITADKQKNGIKANFKIRHNIEDGSVQLADHYQQNTPIGDGPVLL  
PDNHYLSTQSKLSKDPNEKRDHMLLEFVTAAGITLGMDELYKNGL

A gene fragment encoding CFP<sub>PAL</sub> was cloned into pETDuet-1 vector (Novagen) and transformed into Rosetta T1R cells. The cells were grown in LB containing antibiotics to OD<sub>600</sub> 0.6 – 0.8, and induced with addition of 0.5 mM IPTG, shaking at 220 rpm at 18 °C overnight. Cells were harvested by centrifugation at 10,000 rpm at 4 °C for 7 mins and the cell pellet resuspended in lysis buffer containing 20mM Kpi pH 7.0, 500 mM KCl, 2 mM DTT, 10% (w/v) glycerol, 20mM imidazole. Cells were lysed by sonication, and the crude lysate clarified by centrifugation at 21,000 rpm at 4 °C for 1 hour. The crude lysate was filtered before loaded into the Ni-NTA column (Qiagen) for affinity purification. The purified protein fractions were combined and concentrated in buffer containing 20 mM Kpi pH 7.0, 150mM KCl. using 10 kDa MWCO centricon (Millipore).

### Cyan fluorescent protein (CFP<sub>SORT</sub>)

MVSKGEELFTGVVPILVELDGDVNGHKFSVSGEGEGDATYGKLTCLKFICTTGKLPVPWPTLVTTLTWGVQ  
CFSRYPDHMKQHDFFKSAMPEGYVQERTIFFKDDGNYKTRAEVKFEGDTLVNRIELKGIDFKEDGNILGH  
KLEYNVYISHNVYITADKQKNGIKANFKIRHNIEDGSVQLADHYQQNTPIGDGPVLLPDNHYLSTQSKLSKDP  
NEKRDHMLLEFVTAAGITLGMDELYKLPETGLEHHHHHHH

A gene fragment encoding CFP<sub>SORT</sub> was cloned into pET-28b vector (Novagen) and transformed into Rosetta T1R cells. The cells were grown in LB containing antibiotics to OD<sub>600</sub> 0.6 – 0.8, and induced with addition of 0.5 mM IPTG, shaking at 220 rpm at 18 °C overnight. Cells were harvested by centrifugation at 10,000 rpm at 4 °C for 7 mins and the cell pellet resuspended in lysis buffer containing 20mM Kpi pH 7.0, 500 mM KCl, 2 mM DTT, 10% (v/v) glycerol, 20mM imidazole. Cells were lysed by sonication, and the crude lysate clarified by centrifugation at 21,000 rpm at 4 °C for 1 hour. The crude lysate was filtered before loaded into the Ni-NTA column (Qiagen) for affinity purification. The purified protein fractions were combined and concentrated in buffer containing 50 mM Tris HCl, pH 7.5, 150mM NaCl, using 10 kDa MWCO centricon (Millipore).

## **IX. Ligation reaction with peptides**

The ligation reactions using OaAEP1b were performed in 20  $\mu$ L reaction mixtures containing 20 mM phosphate buffer, OaAEP1b ligase (0.01 to 0.3 eq.), peptide substrate (200  $\mu$ M) and oligonucleotide substrate (500  $\mu$ M to 1 mM) at 37°C unless otherwise stated.

The ligation reactions using Sortase A were performed in 20  $\mu$ L reaction mixtures containing 50 mM Tris HCl, 150mM NaCl (pH 7.5) buffer, Sortase A ligase (1 to 3 eq), peptide substrate (200  $\mu$ M) and oligonucleotide substrate (1 mM) at 4°C unless otherwise stated.

The conjugated chimeric product was purified using a reversed-phase analytical column (250 x 4.6 mm, YMC-Triart C18) with a linear gradient from 5% to 40% acetonitrile/TEAA over 35 min on a Nexera UHPLC system (*Shimadzu*). A linear fit of *ODNref* peak area at 260 nm against concentration (10, 50, 100, 150 and 200  $\mu$ M) was used as the calibration plot. The peak at 260 nm corresponding to the conjugated chimeric product was integrated and the yield was then derived from the linear calibration plot. The identity of the HPLC peaks were verified by MALDI-TOF MS (JEOL JMS-S3000) analysis.

## **X. Ligation reaction with CFP**

The ligation reactions using OaAEP1b were performed in 5  $\mu$ L reaction mixtures containing 20 mM phosphate buffer pH 7.4, protein substrate (100  $\mu$ M), oligonucleotide substrate (1 mM) and OaAEP1b ligase (0.02 eq) at 37°C for 1 h. The reaction was monitored by SDS-PAGE.

The ligation reactions using Sortase A were performed in 5  $\mu$ L reaction mixtures containing 50 mM Tris HCl, 150mM NaCl (pH 7.5) buffer, protein substrate (50  $\mu$ M), oligonucleotide substrate (500  $\mu$ M) and Sortase A ligase (1 eq) at 4°C for 16 h. The reaction was monitored by SDS-PAGE.

**Table S1.** All oligonucleotide sequences used in this study.

| Oligo <sup>[a]</sup> | Sequence (5' → 3') <sup>[b],[c],[d]</sup>                                                               | Remarks                                      |
|----------------------|---------------------------------------------------------------------------------------------------------|----------------------------------------------|
| <i>ODNref</i>        | CTATTTGGATGTCAGC                                                                                        | Native                                       |
| <i>ODN1</i>          | /Tag <sub>sort</sub> /CTATTTGGATGTCAGC                                                                  | 5'-Gly-Gly-Gly tagged                        |
| <i>ODN2</i>          | /Tag <sub>sort</sub> /*C*T*A*T*T*T*G*A*T*G*T*C*A*G*C                                                    | 5'-Gly-Gly-Gly tagged PS backbone            |
| <i>ODN3</i>          | CTATTTGGATGTCAGC/Tag <sub>sort</sub> /                                                                  | 3'-Gly-Gly-Gly tagged                        |
| <i>ODN4</i>          | CTATTTGG/Tag <sub>sort</sub> /ATGTCAGC                                                                  | Internal Gly-Gly-Gly tagged                  |
| <i>ODN S1</i>        | /Tag <sub>sort</sub> /TTTTTTTTTT                                                                        | 5'-Gly-Gly-Gly tagged poly dT                |
| <i>ODN S2</i>        | /Tag <sub>sort</sub> /GCATTCTAATAGCAGC                                                                  | 5'-Gly-Gly-Gly tagged                        |
| <i>ODN S3</i>        | /Tag <sub>sort</sub> /TTGGGTGGGTGGGTGGGT                                                                | 5'-Gly-Gly-Gly tagged G4                     |
| <i>ODN S4</i>        | TTGGGTGGG/Tag <sub>sort</sub> /GGGTGGGT                                                                 | Internal loop Gly-Gly-Gly tagged G4          |
| <i>ODN5</i>          | /Tag <sub>pal</sub> /CTATTTGGATGTCAGC                                                                   | 5'-Gly-Leu tagged                            |
| <i>ODN6</i>          | /Tag <sub>pal</sub> /C*T*A*T*T*T*G*A*T*G*T*C*A*G*C                                                      | 5'-Gly-Leu tagged PS backbone                |
| <i>ODN7</i>          | /Tag <sub>pal</sub> / <u>C</u> * <u>I</u> * <u>A</u> *T*T*T*G*A*T*G*T*C* <u>A</u> * <u>G</u> * <u>C</u> | 5'-Gly-Leu tagged PS LNA gapmer              |
| <i>ODN8</i>          | CTATTTGGATGTCAGC/Tag <sub>pal</sub> /                                                                   | 3'-Gly-Leu tagged                            |
| <i>ODN9</i>          | CTATTTGG/Tag <sub>pal</sub> /ATGTCAGC                                                                   | Internal Gly-Leu tagged                      |
| <i>ODN S5</i>        | /Tag <sub>pal</sub> /*C*T*A*T*T*T*G*A*T*G*T*C*A*G*C                                                     | 5'-Gly-Leu tagged PS backbone                |
| <i>ODN S6</i>        | /Tag <sub>pal</sub> /TTTTTTTTTT                                                                         | 5'-Gly-Leu tagged poly dT                    |
| <i>ODN S7</i>        | GCATTCTAATAGCAGC/Tag <sub>pal</sub> /                                                                   | 3'-Gly-Leu tagged                            |
| <i>ODN S8</i>        | /Tag <sub>pal</sub> /SS/CTATTTGGATGTCAGC                                                                | 5'-Gly-Leu tagged disulfide containing oligo |
| <i>ODN S9</i>        | TTGGGTGGG/Tag <sub>pal</sub> /GGGTGGGT                                                                  | Internal loop Gly-Leu tagged G4              |

[a] *ODN1–4* and *ODN S1–S4* are labeled with (Gly-Gly-Gly) tag, while *ODN5–8* and *ODN S5–S9* are labeled with (Gly-Leu) tag. [b] Ligation tags for sortase A (Gly-Gly-Gly) and OaAEP1b (Gly-Leu) are represented as /Tag<sub>sort</sub>/ and /Tag<sub>pal</sub>/, respectively. [c] Phosphorothioate-modified inter-nucleotide linkages are marked with asterisks (\*). [d] /SS/ represents C<sub>6</sub>-disulfide-C<sub>6</sub> modifier.<sup>3</sup>

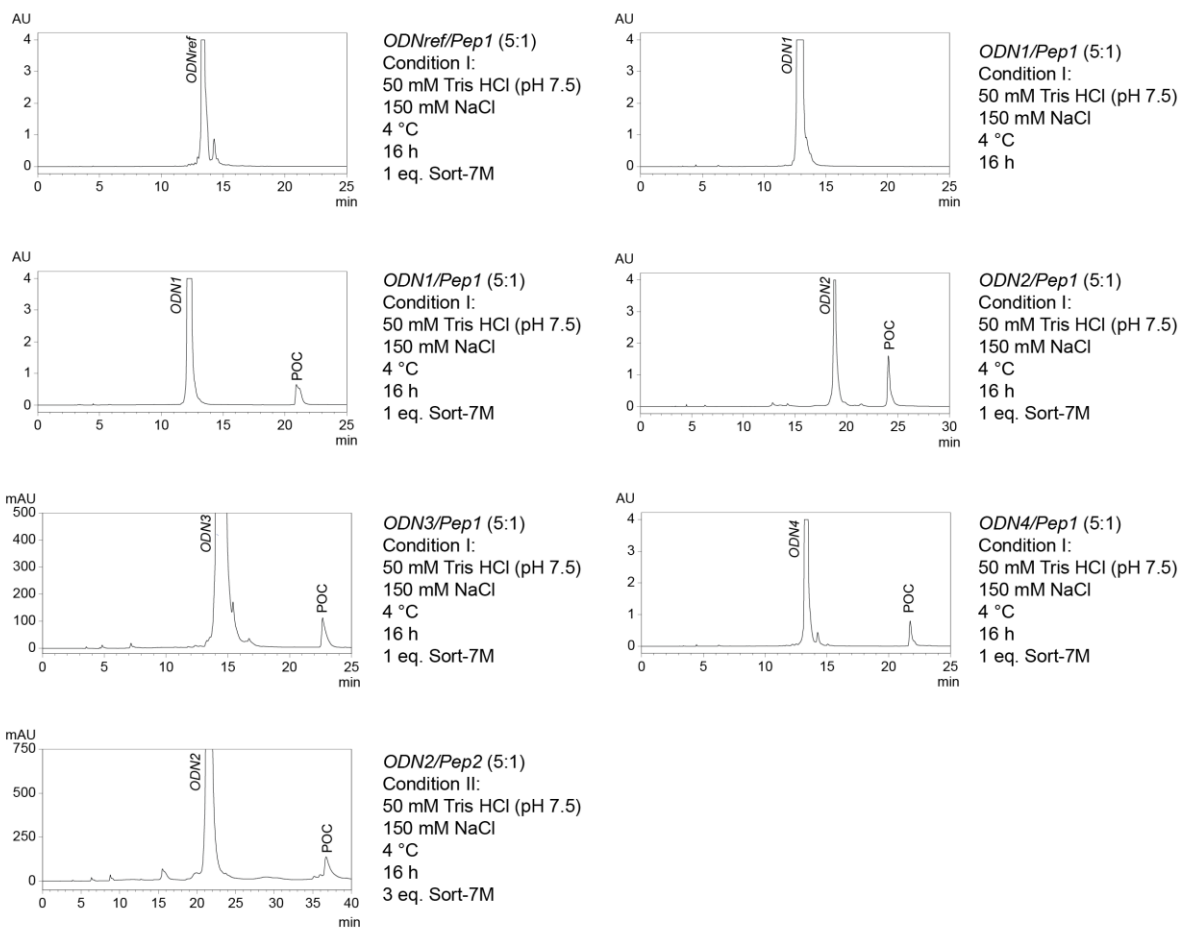

**Figure S1.** HPLC traces for POC ligation reaction of peptides using sortase-7M.

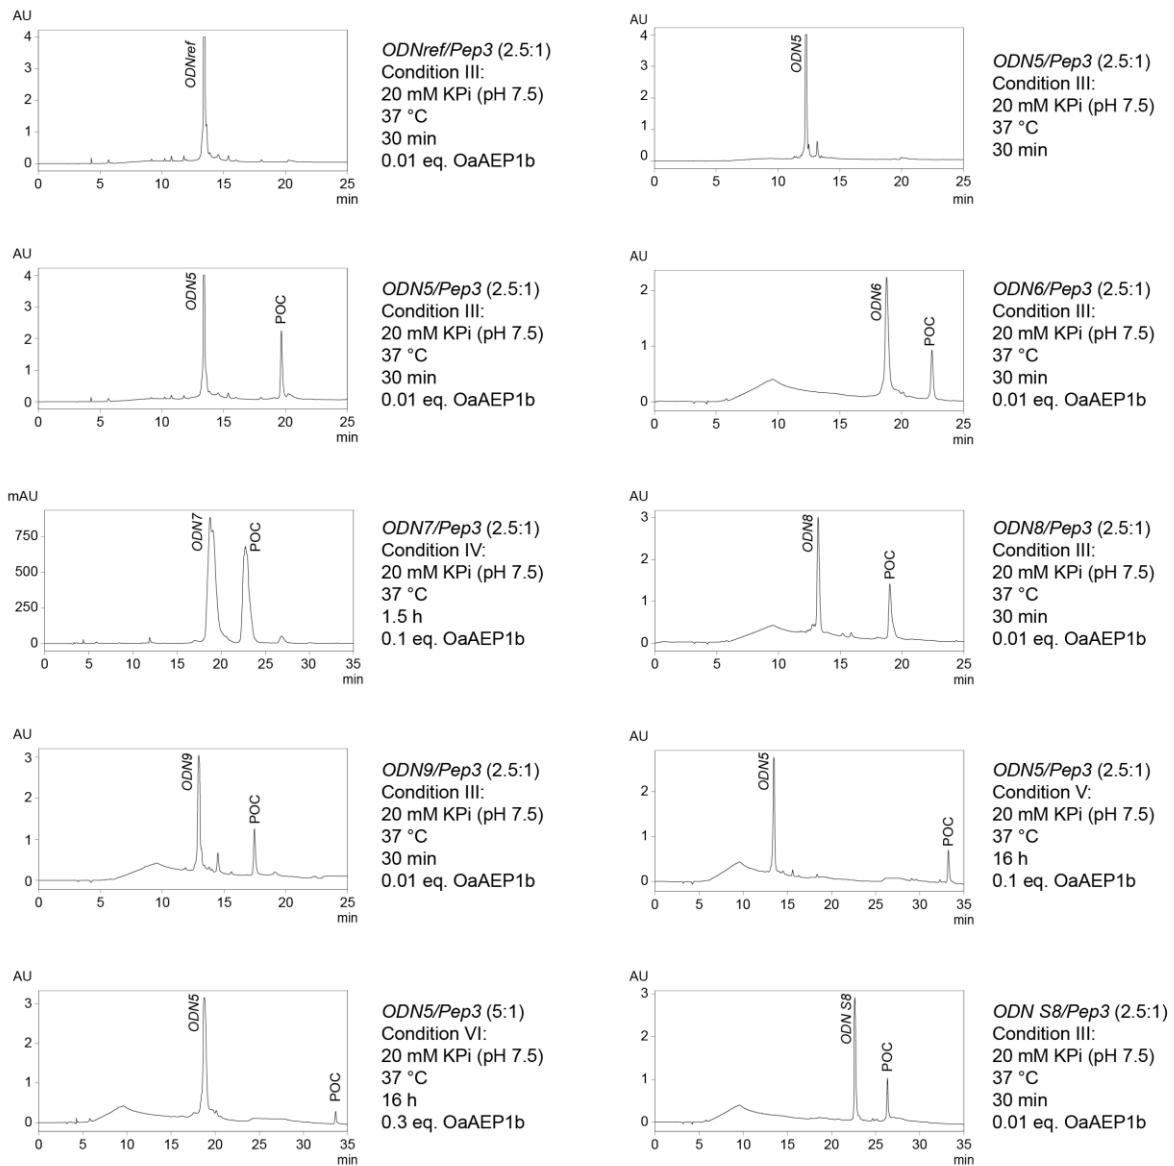

**Figure S2.** HPLC trace for POC reaction of peptides using OaAEP1b.

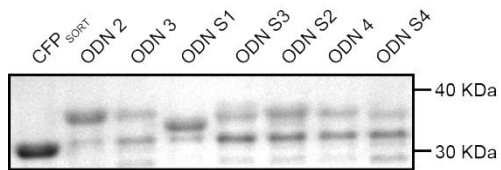

**Figure S3.** SDS-PAGE of ligation reaction between CFP<sub>SORT</sub> protein substrate with different oligonucleotide substrate (10 eq) using sortase-7M ligase (1 eq) at 4°C for 16 h.

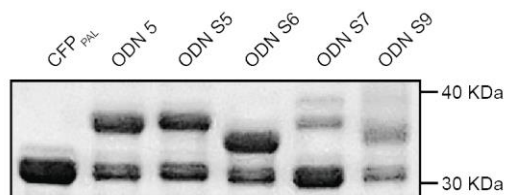

**Figure S4.** SDS-PAGE of ligation reaction between CFP<sub>PAL</sub> protein substrate with different oligonucleotide substrate (10 eq) using *OaAEP1b* (0.1 eq) at 37°C for 1 h.

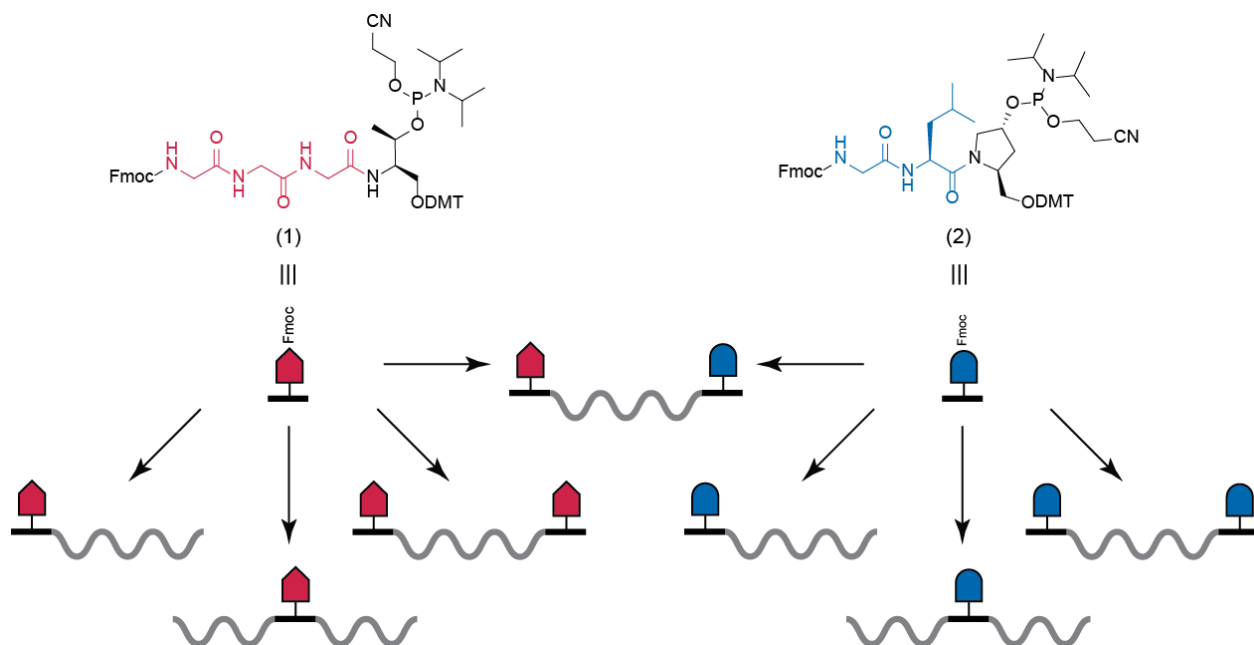

**Figure S5.** Both phosphoramidite tag 1 and 2 can be incorporated at either terminal or internal positions. Incorporation of multiple or a mixture of phosphoramidite tag is also possible.

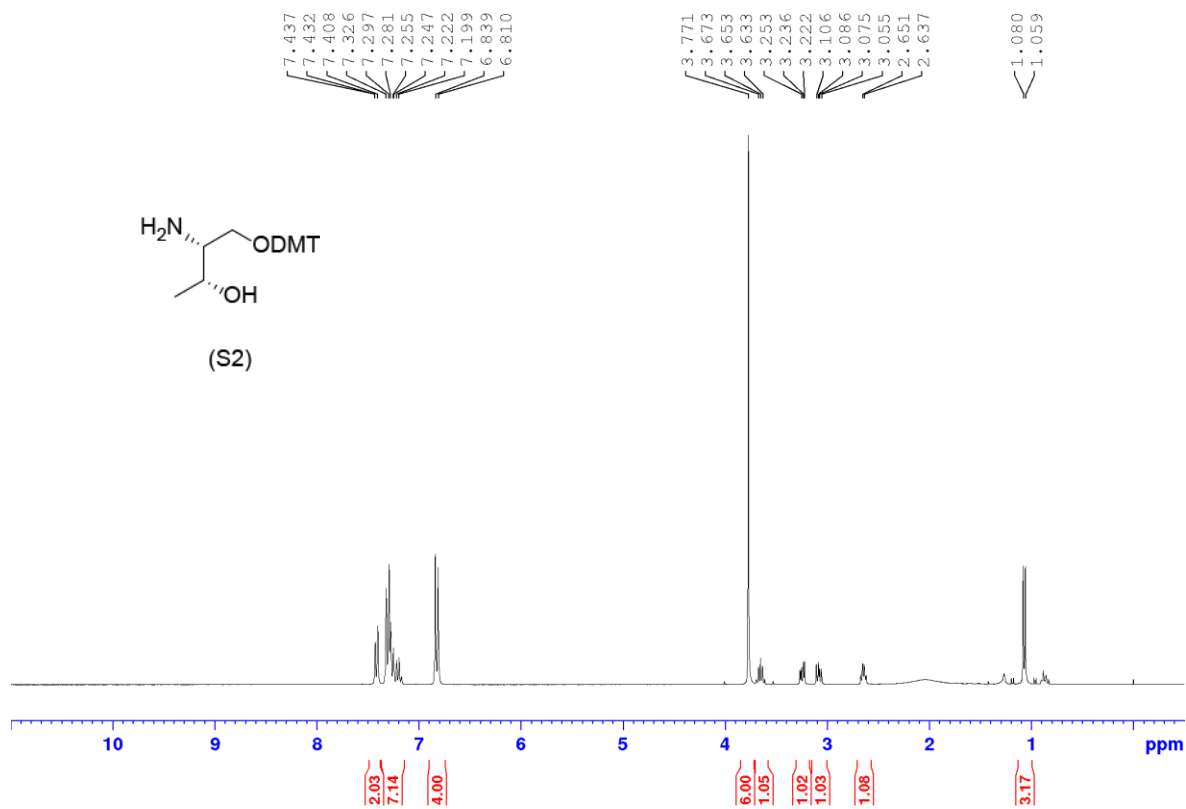

Figure S6.  $^1\text{H}$  NMR spectrum of compound S2.

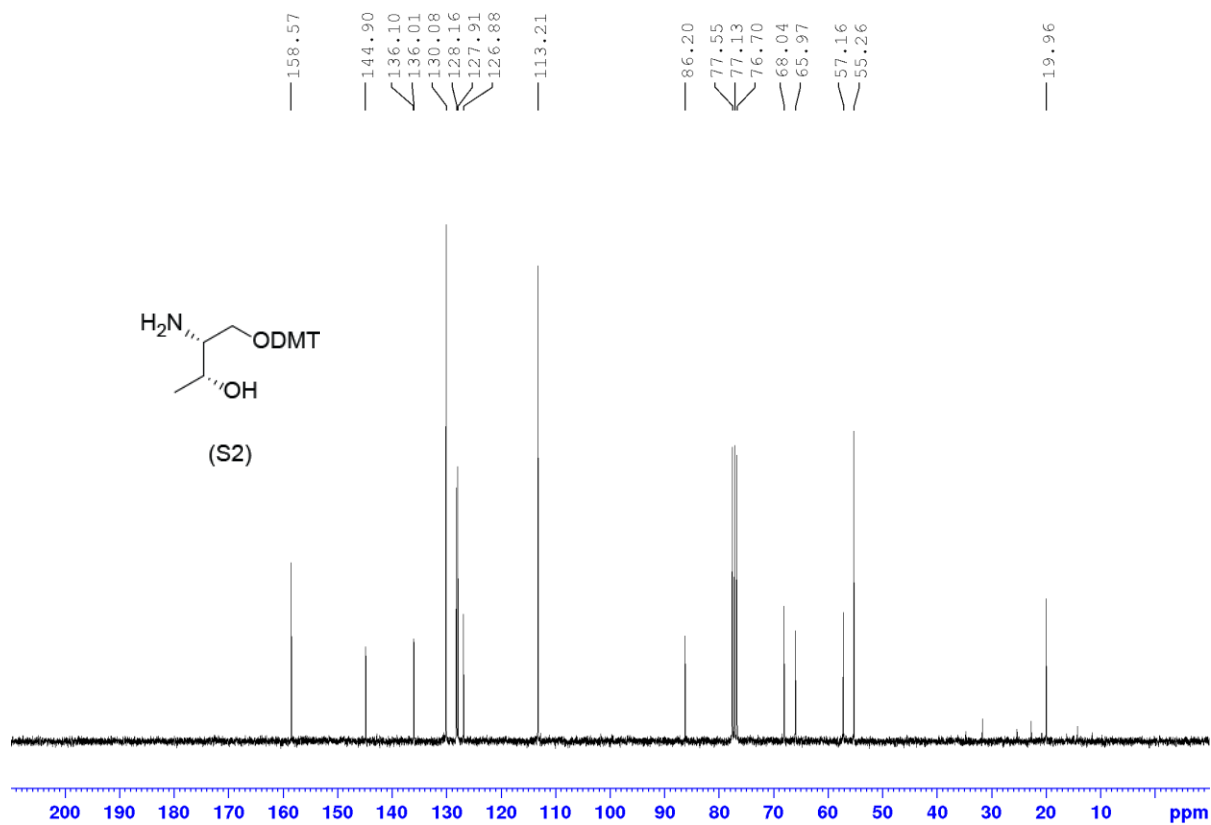

Figure S7.  $^{13}\text{C}$  NMR spectrum of compound S2.

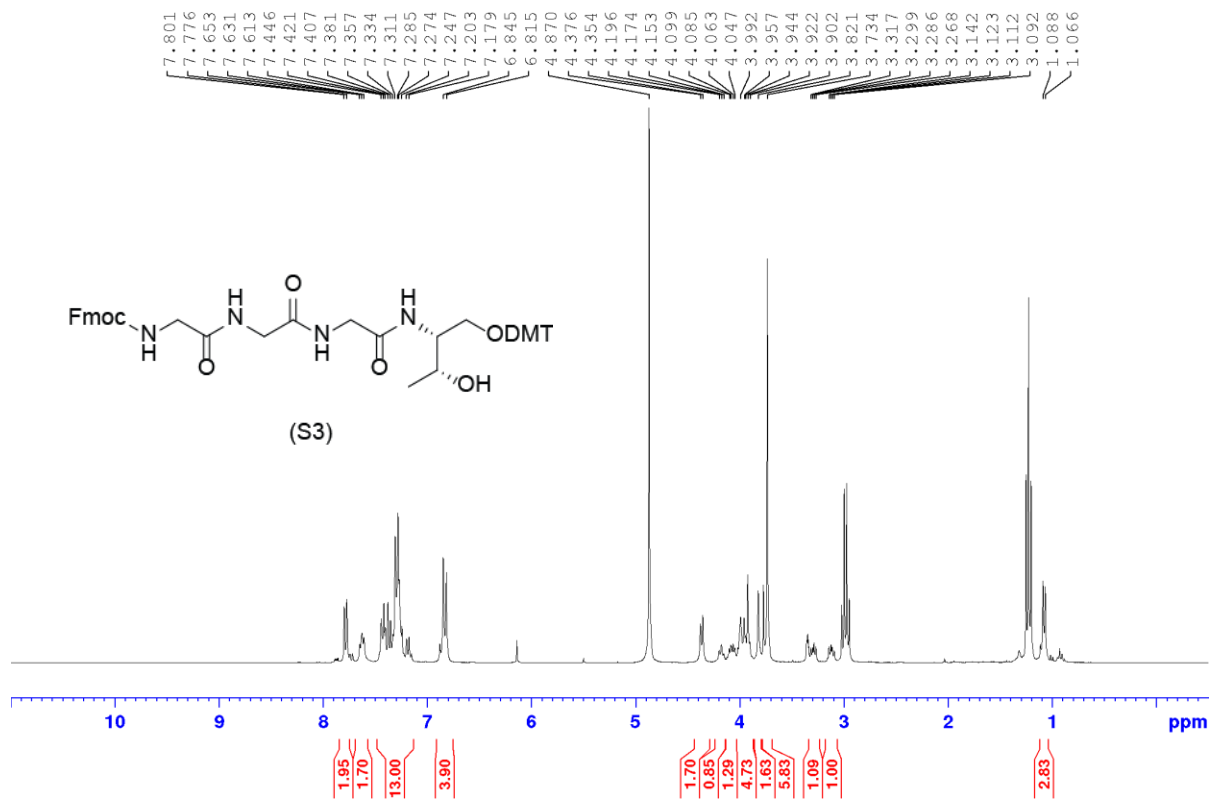

Figure S8. <sup>1</sup>H NMR spectrum of compound S3.

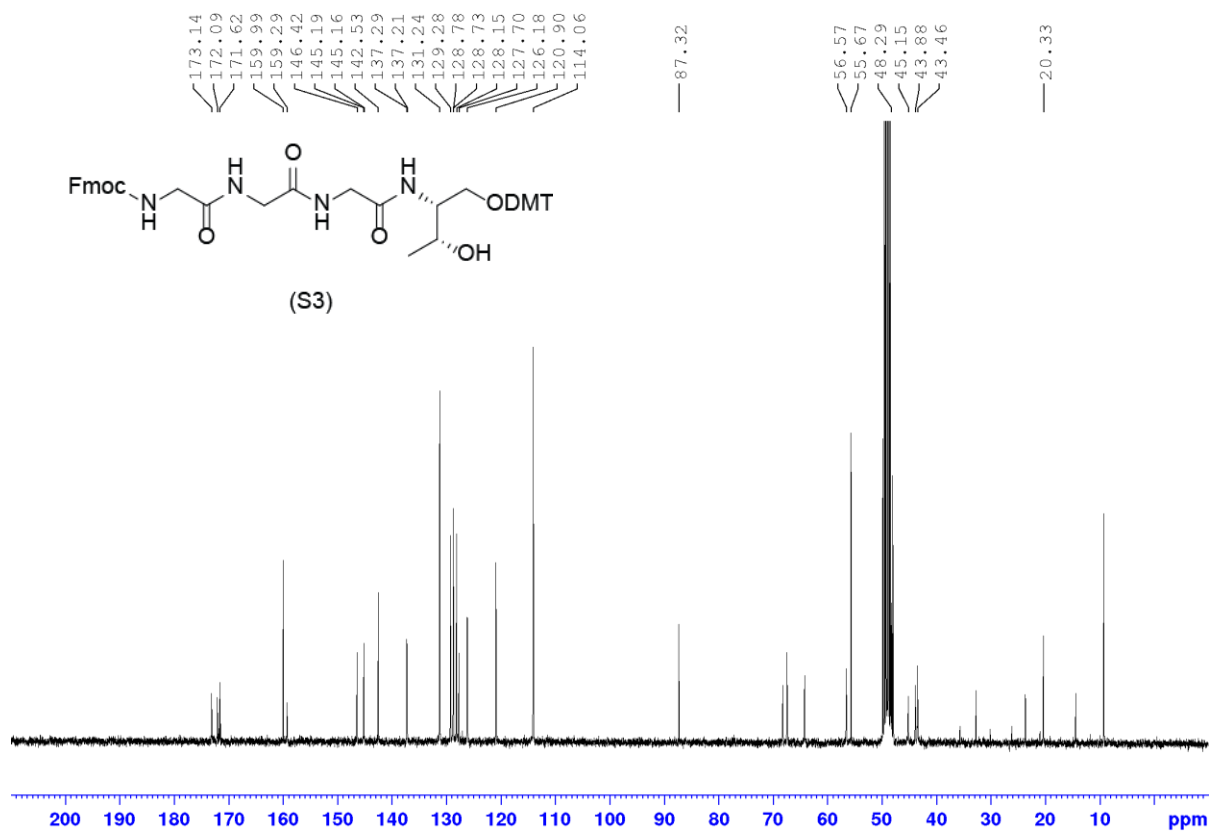

Figure S9. <sup>13</sup>C NMR spectrum of compound S3.



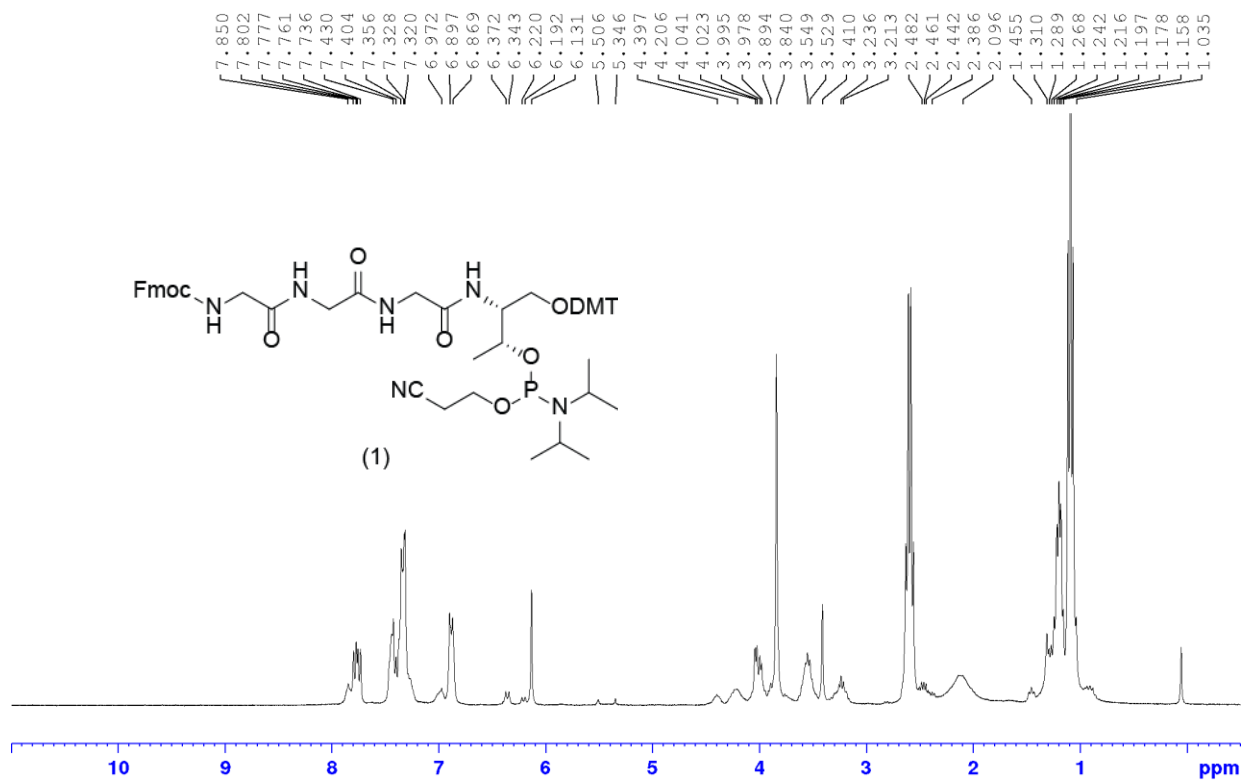

Figure S10.  $^1\text{H}$  NMR spectrum of compound 1.

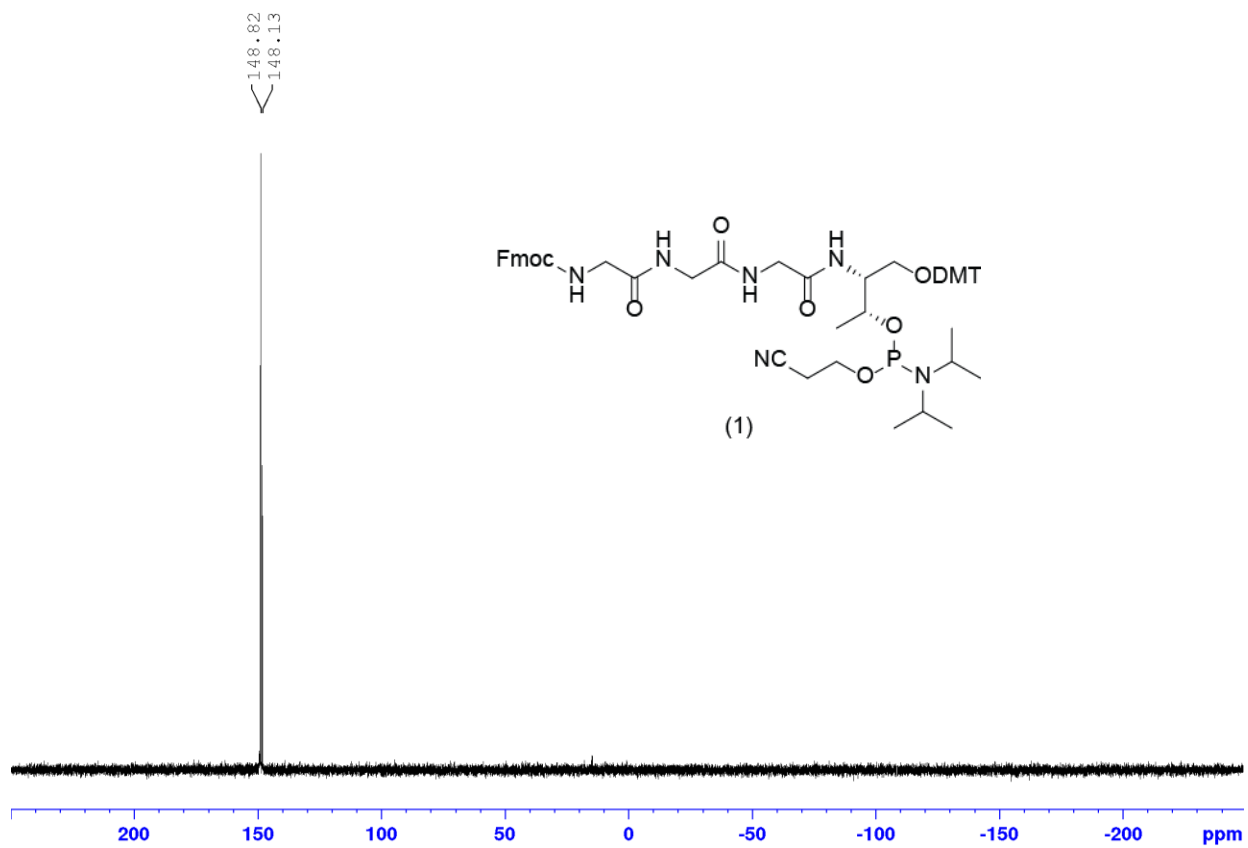

Figure S11.  $^{31}\text{P}\{^1\text{H}\}$  NMR spectrum of compound 1.

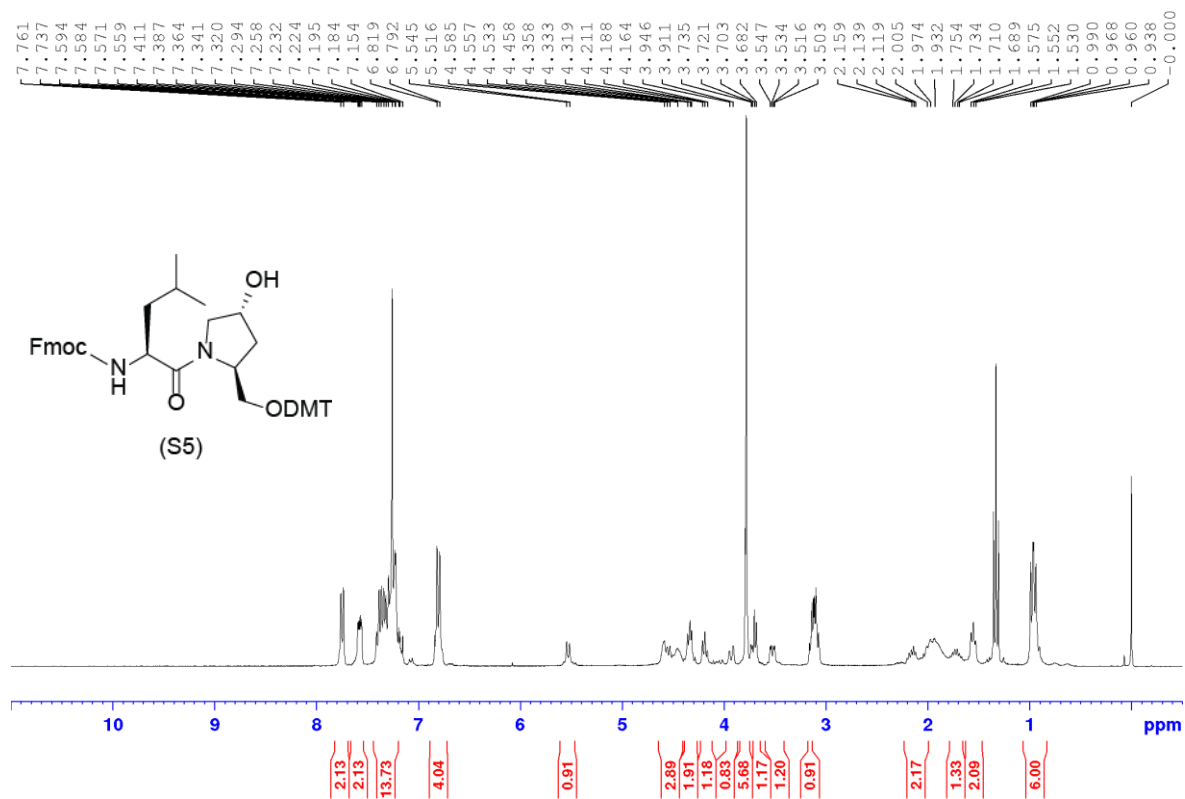

Figure S12. <sup>1</sup>H NMR spectrum of compound S5.

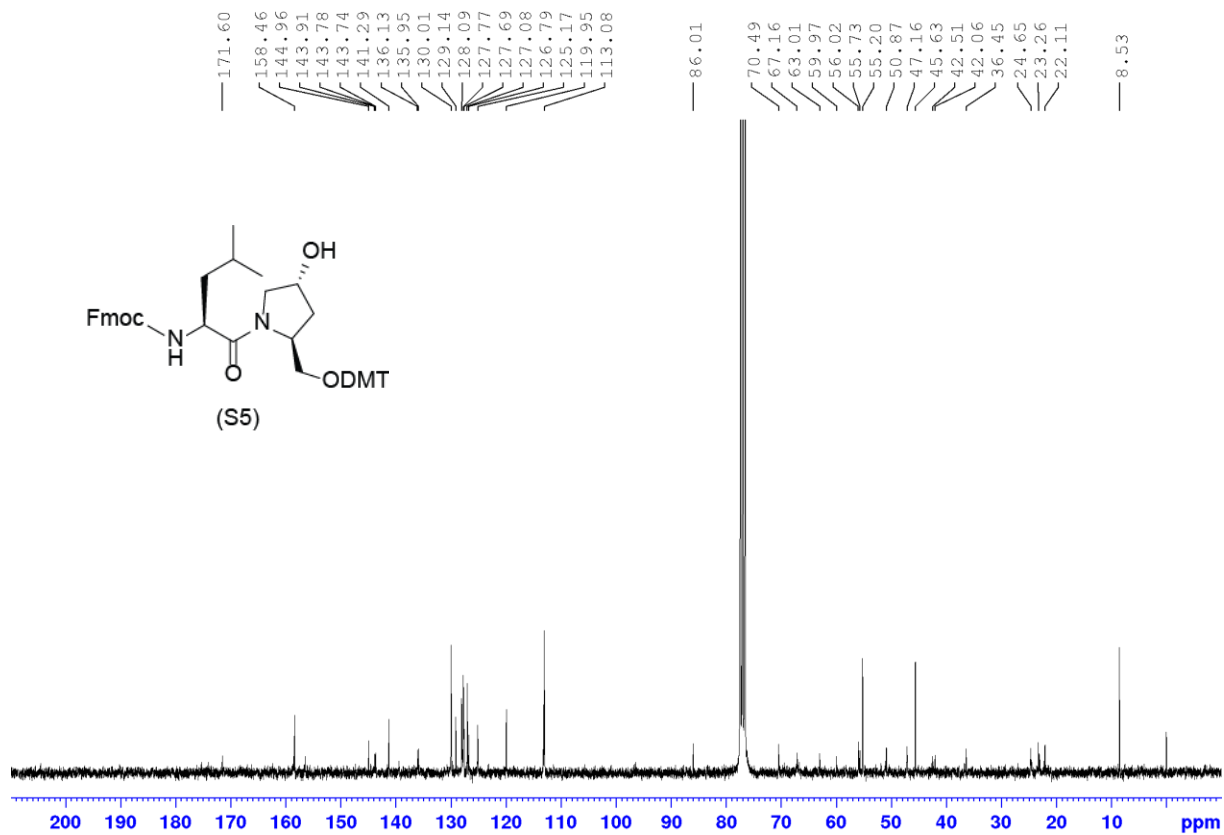

Figure S13. <sup>13</sup>C NMR spectrum of compound S5.

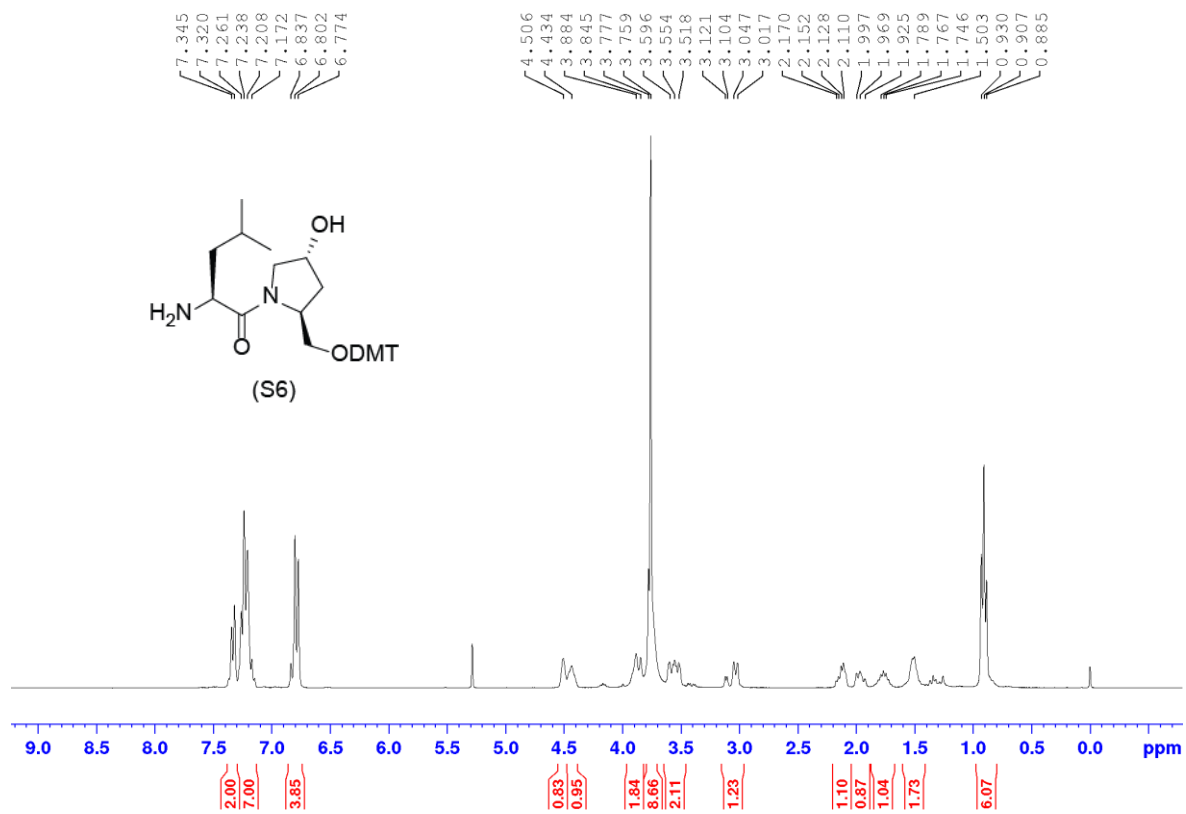

Figure S14. <sup>1</sup>H NMR spectrum of compound S6.

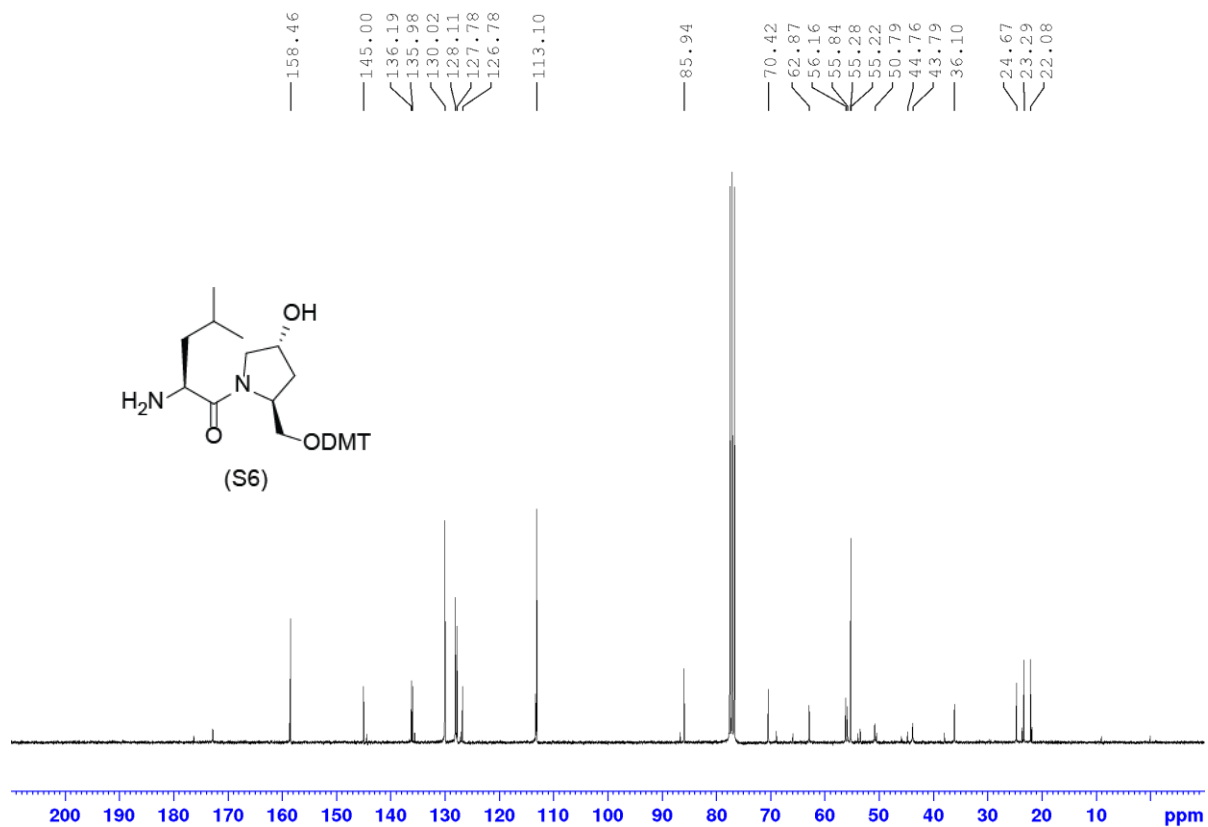

Figure S15. <sup>13</sup>C NMR spectrum of compound S6.

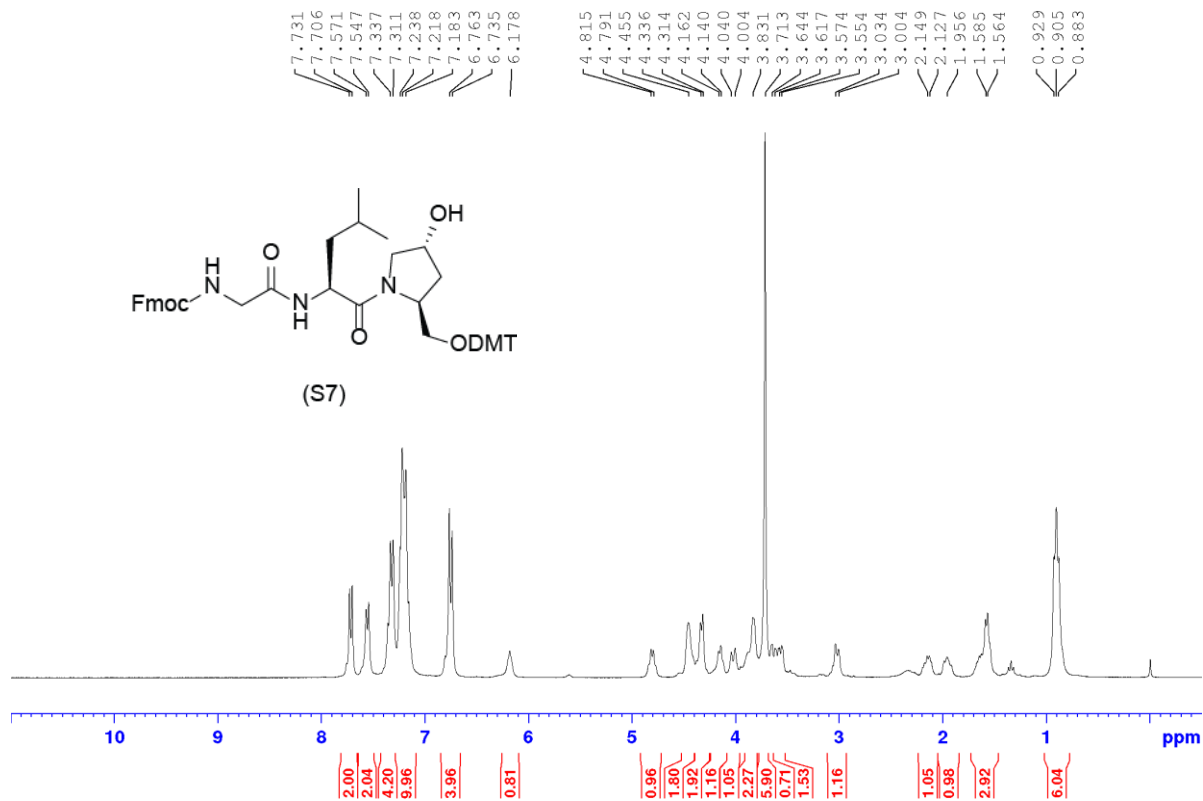

Figure S16. <sup>1</sup>H NMR spectrum of compound S7.

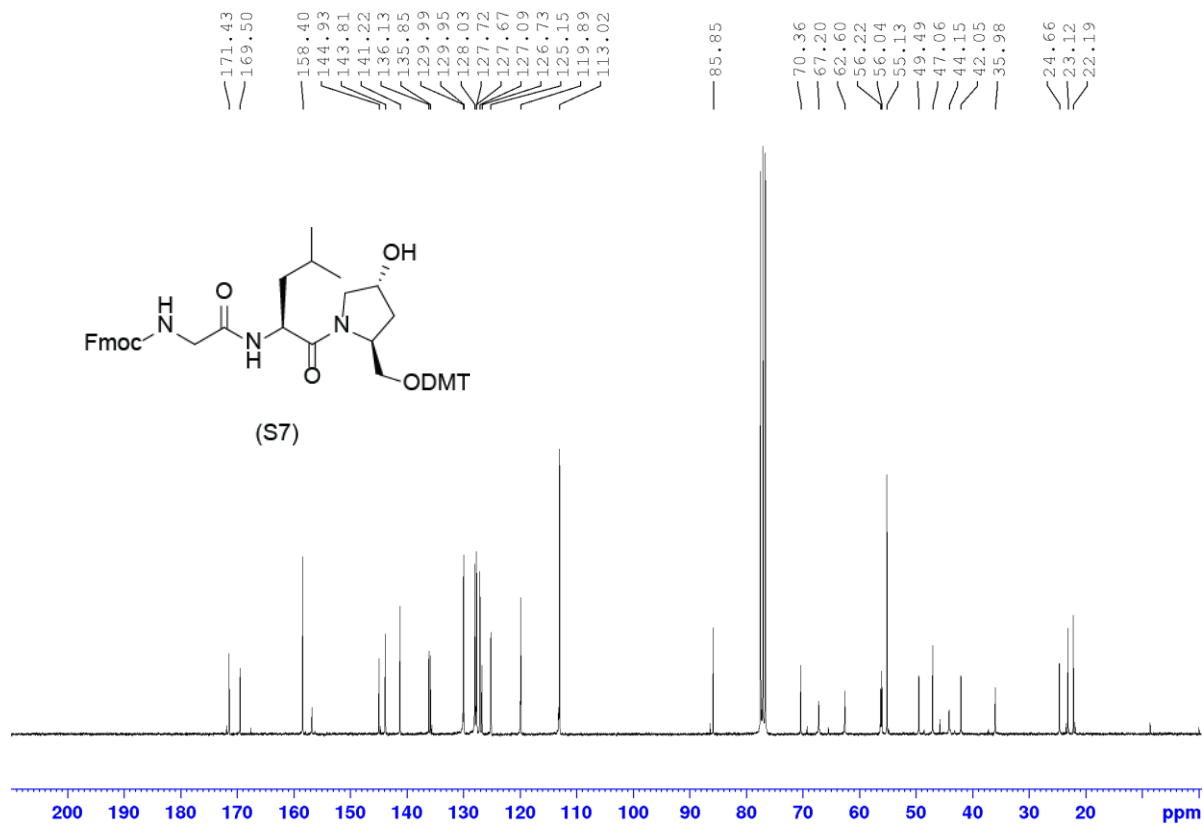

Figure S17. <sup>13</sup>C NMR spectrum of compound S7.

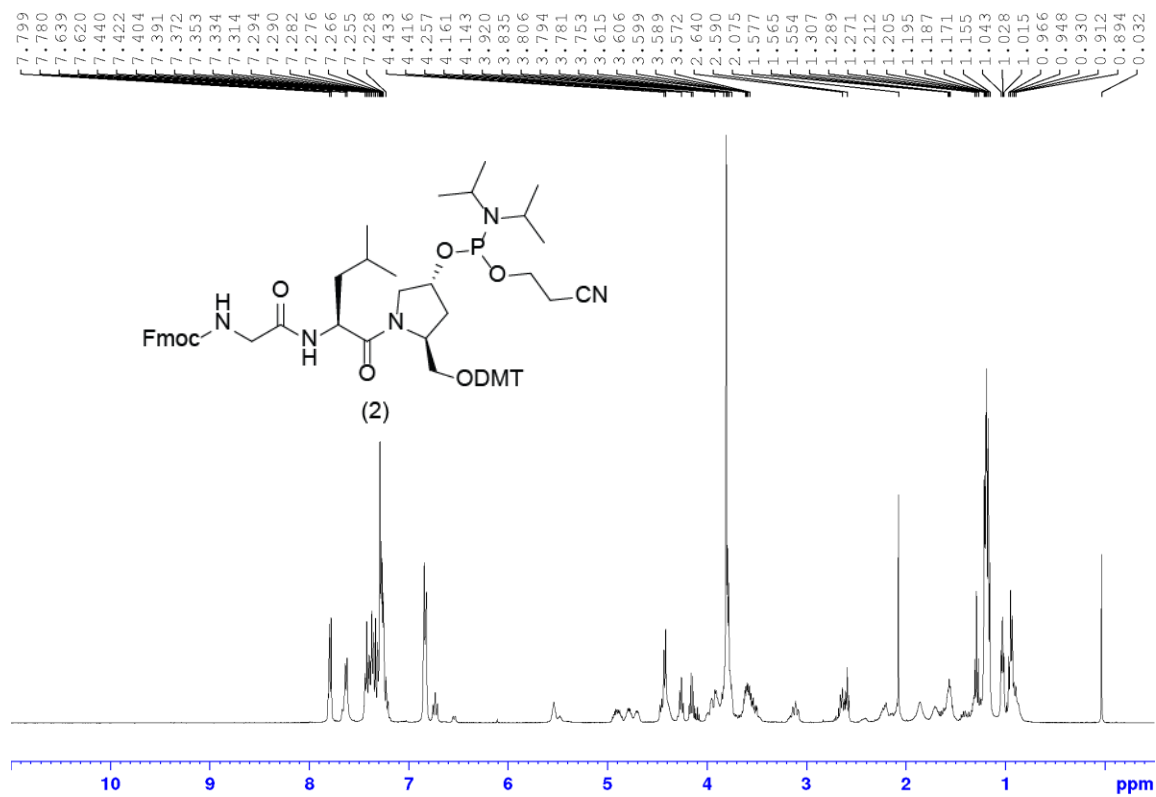

Figure S18. <sup>1</sup>H NMR spectrum of compound 2.

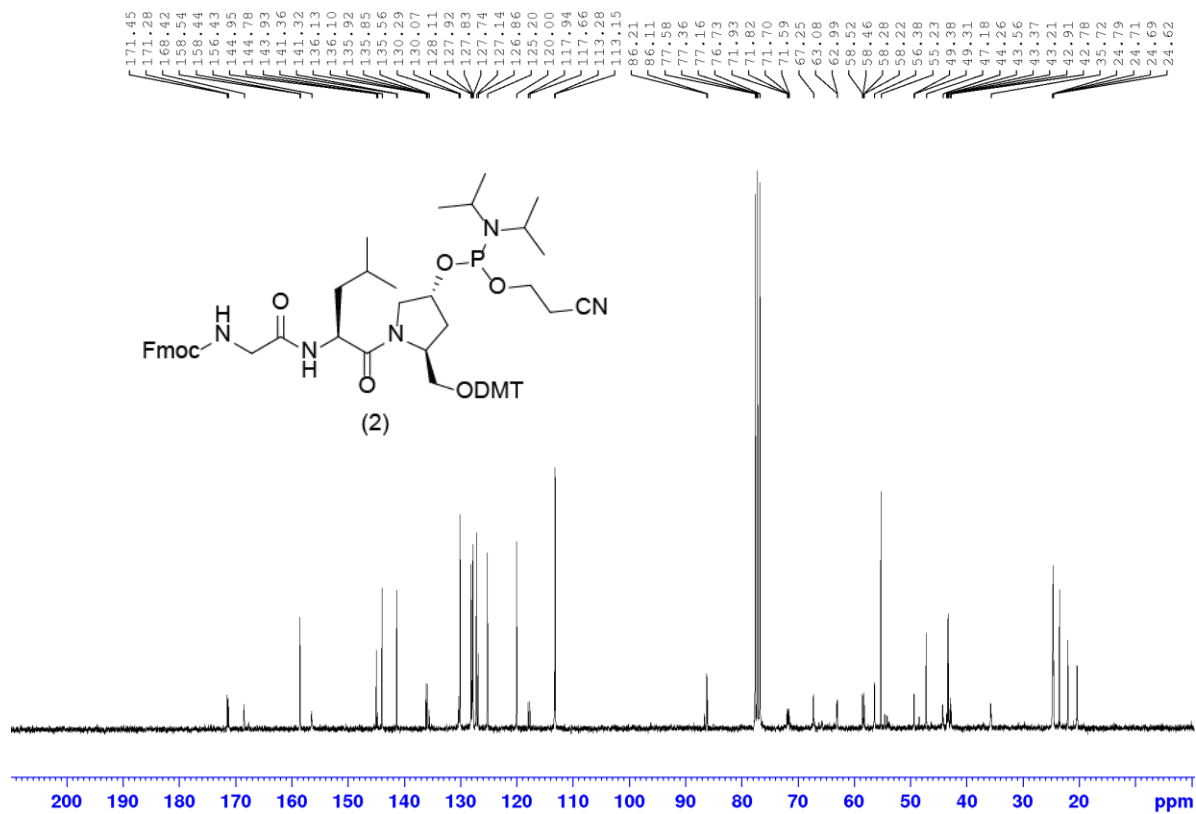

Figure S19. <sup>13</sup>C NMR spectrum of compound 2.

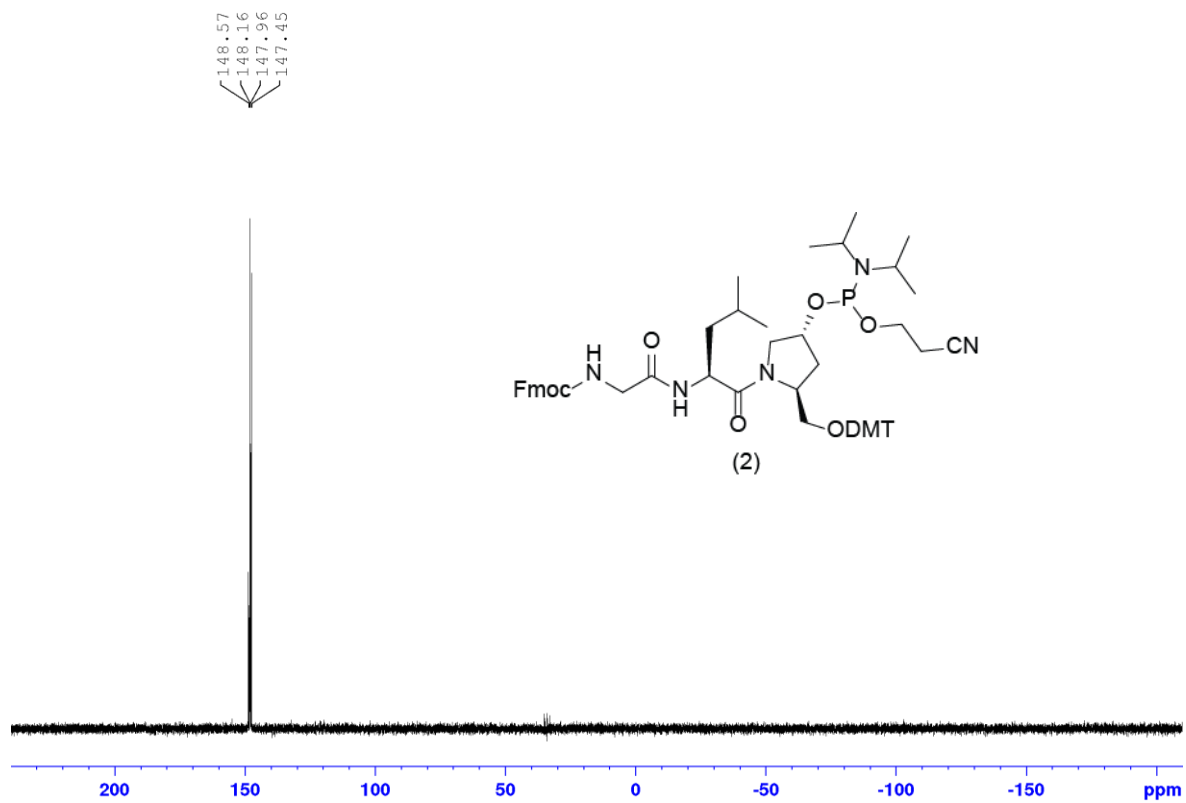

Figure S20.  $^{31}\text{P}$   $\{^1\text{H}\}$  NMR spectrum of compound 2.

## XI. Full SDS-PAGE gel images

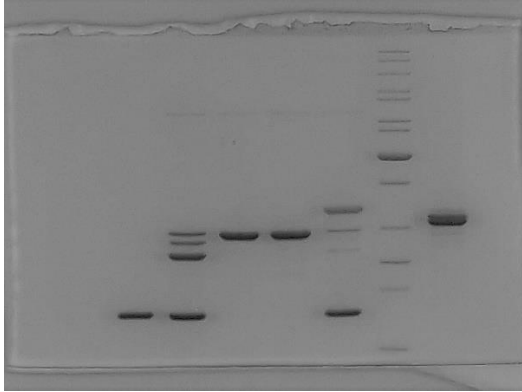

**Figure S21.** Full image of SDS-PAGE gel in Fig. 2b.

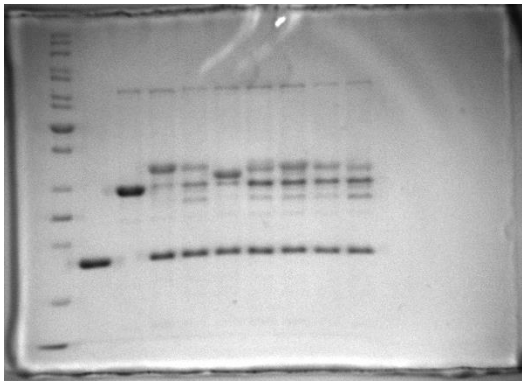

**Figure S22.** Full image of SDS-PAGE gel in Fig. S3.

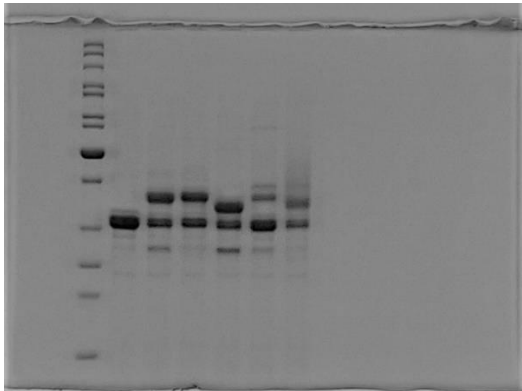

**Figure S23.** Full image of SDS-PAGE gel in Fig. S4.

## XII. References

1. T. P. Prakash, M. J. Graham, J. Yu, R. Carty, A. Low, A. Chappell, K. Schmidt, C. Zhao, M. Aghajan, H. F. Murray, S. Riney, S. L. Booten, S. F. Murray, H. Gaus, J. Crosby, W. F. Lima, S. Guo, B. P. Monia, E. E. Swayze and P. P. Seth, *Nucleic Acids Res.*, 2014, **42**, 8796-8807.
2. R. Yang, Y. H. Wong, G. K. T. Nguyen, J. P. Tam, J. Lescar and B. Wu, *J. Am. Chem. Soc.*, 2017, **139**, 5351–5358.
3. <https://www.glenresearch.com/10-1936.html>.
